# Supplementary material for: The Exploitation of Toxic Fish from the Terminal Pleistocene in Maritime Southeast Asia: A Case Study from the Mindoro Archaeological Sites, Philippines
Source: MDPI journal article supplement (doi:10.3390/ani13132113), 2023-06-26
Supplement: s1 [file s1]

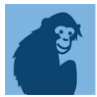

Supplementary material for

# The Exploitation of Toxic Fish from the Terminal Pleistocene in Maritime Southeast Asia: A Case Study from the Mindoro Archaeological Sites, Philippines

Clara Boulanger <sup>1,2,3,\*</sup>, Alfred Pawlik <sup>4,5,6</sup>, Sue O'Connor <sup>2,7</sup>, Anne-Marie Sémah <sup>1</sup>, Marian C. Reyes <sup>8,9</sup> and Thomas Ingicco <sup>1</sup>

<sup>1</sup> UMR 7194 Histoire Naturelle de l'Homme Préhistorique, Muséum National d'Histoire Naturelle, 75005 Paris, France

<sup>2</sup> Archaeology and Natural History, School of Culture, History and Language, College of Asia and the Pacific, Australian National University, Canberra, ACT 2601, Australia

<sup>3</sup> Japan Society for the Promotion of Science International Research Fellow, Department of Modern Society and Civilization, National Museum of Ethnology, Osaka 565-8511, Japan

<sup>4</sup> Department of Sociology and Anthropology, School of Social Sciences, Ateneo de Manila University, Quezon City 1108, Philippines

<sup>5</sup> TRACES ASIA, 3F Eduardo J. Aboitiz Sandbox Zone, Areté, Ateneo de Manila University, Quezon City 1108, Philippines

<sup>6</sup> Department of Early Prehistory and Quaternary Ecology, Eberhard Karls Universität Tübingen, Schloss Hohentübingen, 72074 Tübingen, Germany

<sup>7</sup> ARC Centre of Excellence for Australian Biodiversity and Heritage, Australian National University, Canberra, ACT 2601, Australia

<sup>8</sup> The National Museum of the Philippines, Manila 1000, Philippines

<sup>9</sup> School of Archaeology, University of the Philippines Diliman, Quezon City 1101, Philippines

\* Correspondence: clara.boulanger@mnhn.fr

Supplementary Table S1. NISP, MNE, MNI and burning marks of Diodontidae at Bubog I.

| Datings               | Layer    | NISP to family level | NISP to species level | Anatomical element                  | MNI      | Burning    |
|-----------------------|----------|----------------------|-----------------------|-------------------------------------|----------|------------|
| Neolithic             | 1        | 4                    | 1                     | Dentary (MNE = 1)                   | 1        | 0          |
|                       |          |                      |                       | Dermal spine (MNE = 3)              |          | 3          |
|                       | 2        | 5                    | 0                     | Dermal spine (MNE = 5)              | 1        | 5          |
| 4,848-4,651 cal. BP   | 3        | 9                    | 0                     | Dermal spine (MNE = 9)              | 1        | 1          |
|                       | 4        | 9                    | 0                     | Dermal spine (MNE = 9)              | 1        | 7          |
| 5,628-5,309 cal. BP   | 5        | 41                   | 1                     | Premaxilla (MNE = 1)                | 1        | 1          |
|                       |          |                      |                       | Unidentified jaw fragment (MNE = 1) |          | 1          |
|                       |          |                      |                       | Dermal spine (MNE = 39)             |          | 35         |
|                       | 6        | 68                   | 0                     | Dermal spine (MNE = 68)             | 1        | 66         |
|                       | 7        | 7                    | 0                     | Dermal spine (MNE = 7)              | 1        | 7          |
| 7,341-7,012 cal. BP   | 8        | 5                    | 0                     | Dermal spine (MNE = 5)              | 1        | 4          |
| 33,040-31,736 cal. BP | 9        | 0                    | 0                     | NA                                  | 0        | 0          |
|                       | 10       | 0                    | 0                     | NA                                  | 0        | 0          |
|                       | 11       | 0                    | 0                     | NA                                  | 0        | 0          |
|                       | 12       | 0                    | 0                     | NA                                  | 0        | 0          |
| <b>Total</b>          | <b>x</b> | <b>148</b>           | <b>2</b>              | <b>NA</b>                           | <b>8</b> | <b>130</b> |

Supplementary Table S2. NISP, MNE, MNI and burning marks of Diodontidae at Bubog II

| Datings                       | Layer | NISP to family level | NISP to species level | Anatomical element     | MNI      | Burning  |
|-------------------------------|-------|----------------------|-----------------------|------------------------|----------|----------|
| Neolithic/Pre-colonial period | 1     | 0                    | 0                     | NA                     | 0        | 0        |
|                               | 2     | 1                    | 0                     | Dermal spine (MNE = 1) | 1        | 0        |
|                               | 3     | 1                    | 0                     | Dermal spine (MNE = 1) | 1        | 0        |
|                               | 4     | 6                    | 0                     | Dermal spine (MNE = 6) | 1        | 0        |
| c. 4,800-4,600 cal. BP        | 5     | 6                    | 1                     | Premaxilla (MNE = 1)   | 1        | 0        |
|                               |       |                      | 2                     | Dermal spine (MNE = 5) |          | 2        |
|                               | 6     | 2                    | 0                     | Dermal spine (MNE = 2) | 1        | 0        |
| 5,930-5,744 cal. BP           | 7     | 8                    | 1                     | Dentary (MNE = 1)      | 1        | 0        |
|                               |       |                      |                       | Dermal spine (MNE = 7) | 1        | 2        |
|                               | 8     | 5                    | 0                     | Dermal spine (MNE = 5) | 1        | 0        |
|                               | 9     | 1                    | 0                     | Dermal spine (MNE = 1) | 1        | 0        |
|                               | 10    | 0                    | 0                     | NA                     | 0        | 0        |
|                               | 11    | 0                    | 0                     | NA                     | 0        | 0        |
| 9,536-9,316 cal. BP           | 12    | 0                    | 0                     | NA                     | 0        | 0        |
| <b>Total</b>                  |       | <b>30</b>            | <b>4</b>              |                        | <b>9</b> | <b>4</b> |

Supplementary Table S3. NISP, MNE, MNI and burning marks at Bilat Cave

| Datings                      | Layer | NISP to family level | NISP to species level | Anatomical element     | MNI      | Burning   |
|------------------------------|-------|----------------------|-----------------------|------------------------|----------|-----------|
| 8,185-8,033 cal. BP (bottom) | 1     | 2                    | 0                     | Dermal spine (MNE = 2) | 1        | 0         |
|                              | 2     | 11                   | 2                     | Premaxilla (MNE = 1)   | 1        | 0         |
|                              |       |                      |                       | Dentary (MNE = 1)      |          | 0         |
|                              |       |                      |                       | Dermal spine (MNE = 9) |          | 9         |
| 13,790-13,596 cal. BP        | 3     | 1                    | 0                     | Dentary (MNE = 1)      | 1        | 1         |
|                              | 4     | 1                    | 0                     | Dermal spine (MNE = 1) | 1        | 1         |
| <b>Total</b>                 |       | <b>15</b>            | <b>2</b>              |                        | <b>4</b> | <b>11</b> |
